# Supplementary material
Source: PubMed Central journal article supplement (PMC2698996)
Supplement: NIHMS111039-supplement-1.pdf [file NIHMS111039-supplement-1.pdf]

1

2 **Support Materials 1**

3 Definition of the symbols used in paper:

|    |               |                                 |
|----|---------------|---------------------------------|
| 4  | $E_m$         | Young's modulus of membrane     |
| 5  | $E_c$         | Young's modulus of cytoskeleton |
| 6  | $F$           | force                           |
| 7  | $R_0$         | radius of the uncompressed cell |
| 8  |               |                                 |
| 9  | $\varepsilon$ | relative deformation            |
| 10 | $\nu_m$       | Poisson ratio of membrane       |
| 11 | $\nu_c$       | Poisson ratio of cytoskeleton   |

12

13 **Support Materials 2**

14 In our model, prior to compression living cell mechanical structure is  
 15 approximated as a spherical impermeable elastic balloon (spherical membrane). This  
 16 balloon is filled with an incompressible fluid and gel-like materials.

17 Calculation of fluid-filled impermeable spherical membrane deformation between  
 18 parallel plates assumes that under small deformations the lateral part of membrane  
 19 extends spherically (except contact regions)<sup>46</sup>. Then, using the volume conservation, the  
 20 lateral radius of the membrane after deformation,  $R$ , can be calculated from the initial  
 21 membrane radius  $R_0$  and relative deformation  $\varepsilon$ :

$$22 \quad R = R_0 + \frac{R_0}{2} \varepsilon^2 \quad (\text{A1})$$

23

24 The energy of the stretching of the membrane  $G$  with thickness  $h$  according to elastic  
 25 theory is:

$$26 \quad G = \frac{h}{2} \int u_{\alpha\beta} \sigma_{\alpha\beta} dS \quad (\text{A2})$$

27 where integration is over membrane surface,  $u_{\alpha\beta}$  is two-dimensional deformation and  $\sigma_{\alpha\beta}$   
 28 is two-dimensional deformation stress tensors:

$$29 \quad \sigma_{\alpha\beta} = \frac{E_m}{1 - \nu_m^2} [(1 - \nu) u_{\alpha\beta} + \nu \delta_{\alpha\beta} u_{\gamma\gamma}] \quad (\text{A3})$$

30

1 where  $E_m$  is Young's modulus,  $\nu_m$  is Poisson ratio of membrane, and summation must be  
 2 over repeating indices.

3 Balance of stress defines the pressure inside the balloon:

$$4 \quad P = \frac{h}{R}(\sigma_{\theta\theta} + \sigma_{\phi\phi}) \quad (\text{A4})$$

6 Using the relation between stress and deformation tensors,

$$7 \quad \begin{aligned} Eu_{\theta\theta} &= \sigma_{\theta\theta} - \nu\sigma_{\phi\phi} \\ Eu_{\phi\phi} &= \sigma_{\phi\phi} - \nu\sigma_{\theta\theta} \end{aligned} \quad (\text{A5})$$

8 and the assumption that the deformed balloon has a spherical shape, yields

$$9 \quad u_{\phi\phi} = u_{\theta\theta} = \frac{u_r}{r} = \frac{r - r_0}{r_0} \quad (\text{A6})$$

11 and the stress tensors

$$12 \quad \sigma_{\phi\phi} = \sigma_{\theta\theta} = \frac{E_m}{1 - \nu} \frac{r - r_0}{r_0} \quad (\text{A7})$$

14 Substituting Eq. A6 and Eq. A7 to Eq. A2, we obtain the elastic energy of the spherical  
 15 membrane stretching:

$$16 \quad G_{el} \approx 4\pi \frac{E_m}{1 - \nu_m} (r - r_0)^2 \quad (\text{A8})$$

17 Correspondingly, the reaction force (load)

$$18 \quad F_{el} = -\frac{\partial G_{el}}{\partial Z} = 2\pi \frac{E_m}{1 - \nu_m} hR_0 \varepsilon^3 \quad (\text{A9})$$

20 has cubic dependence on relative deformation  $\varepsilon$ .

21 Note that membrane bending was ignored. For bending of the noncontact area of a  
 22 spherical membrane, the bending contribution is proportional to  $(h/R)^2$ <sup>36</sup>. For a typical  
 23 cellular membrane of  $R = 5 \mu\text{m}$  and  $h = 4 \text{ nm}$ ,  $h/R$  is less than  $10^{-6}$  and can thus be  
 24 neglected. However, strong membrane bending does occur at the contact region. The  
 25 change from the membrane in contact with the substrate to the free membrane, at the

1 contact angle  $\theta$ , happens over a length comparable to the membrane thickness. Then the  
 2 local radius of curvature of the membrane near the separation line can be estimated as  
 3  $\rho = h/\theta$ . Elastic energy of bending using from beam theory is:

$$G_b \approx \frac{E_m I}{2} \frac{hl}{\rho^2} \quad (\text{A10})$$

5 where  $I = h^3/12$  is the second momentum of the area of the contact, and  $l = 4\pi r \sin\theta \approx$   
 6  $4\pi r\theta$ , is the total length of contact. Substituting  $l$  and  $I$  back to the expression of the  
 7 bending energy (Eq. A10), and taking into account the volume conservation requirement  
 8  $R - R_0 \approx (R_0 \theta^4)/8$  we obtain:

$$G_b \approx \frac{\sqrt{2}\pi}{3} E_m h^2 R_0 \varepsilon^{3/2} \quad (\text{A11})$$

10 The force due to contact area bending therefore equals:

$$F_b = -\frac{\partial G_b}{\partial Z} = \frac{\pi}{2\sqrt{2}} E_m h^2 \varepsilon^{1/2} \quad (\text{A12})$$

12 The ratio between the bending and stretching terms can be calculated using Eq. A9 and  
 13 Eq. A12:

$$\frac{F_{bending}}{F_{stretching}} \approx \frac{h}{R_0} \frac{1}{\varepsilon^{5/2}} \quad (\text{A13})$$

15 Given that lipid bilayer thickness ( $h$ ) is typically 4 nm, while cell radius is above 5  $\mu\text{m}$ , at  
 16  $\varepsilon = 0.1-0.3$ , this ratio is below 0.05. Therefore, one can neglect the bending deformation  
 17 contribution, and use Eq. A9 to estimate fluid-filled the impermeable spherical  
 18 membrane's deformation.

19 Cytoskeletal compression can be estimated using contact Hertz theory. Assuming  
 20 that glass is much harder than the cell and has infinite radius of curvature, the  
 21 deformation of the cytoskeleton compressed between two parallel plates can be  
 22 calculated using<sup>36</sup>

$$F_c = \frac{\sqrt{2}E_c}{3(1-\nu_c^2)} R_0^2 \varepsilon^{3/2} \quad (\text{A14})$$

1 where  $R_0$  represents the cell contact radius before deformation and  $E_c$  and  $\nu_c$  are the  
2 Young's modulus and Poisson ratio of the cytoskeleton, respectively.

3 Therefore superposition of Eq. A9 and Eq A14 gives overall cell deformation in  
4 estimation as:

$$F = \frac{\sqrt{2}E_c}{3(1-\nu_c^2)} R_0^2 \varepsilon^{3/2} + 2\pi \frac{E_m}{1-\nu} hR_0 \varepsilon^3 \quad (\text{A15})$$

5 where first term arises from the cytoskeleton compression resistance and is responsible  
6 for global membrane stretching, and membrane-to-cytoskeleton attachment is neglected
